# Supplementary material for: Burden of bacterial upper respiratory tract pathogens in school children of Nepal
Source: PubMed Central journal article supplement — BMJ Open Respir Res. 2017 Oct 13;4(1):e000203. doi: 10.1136/bmjresp-2017-000203 (PMC5652512; doi:10.1136/bmjresp-2017-000203), 2017-10-13
Supplement: bmjresp-2017-000203supp003.pdf [file bmjresp-2017-000203supp003.pdf]

**Supplementary table 2:** Number of species isolated school wise and in each season

|               | <b>Number of organisms isolated</b> |                        |                          | <b>Total number of organisms isolated</b> |
|---------------|-------------------------------------|------------------------|--------------------------|-------------------------------------------|
|               | One<br>species/student              | Two<br>species/student | Three<br>species/student |                                           |
| <b>School</b> |                                     |                        |                          |                                           |
| Government    | 19                                  | 56                     | 27                       | 212 (19x1+56x2+27x3)                      |
| Private       | 40                                  | 44                     | 18                       | 182 (40x1+44x2+18x3)                      |
| Total         | 59                                  | 100                    | 45                       | 394 (59x1+100x2+45x3)                     |
| <b>Season</b> |                                     |                        |                          |                                           |
| Summer        | 46                                  | 47                     | 7                        | 161 (46x1+47x2+7x3)                       |
| Winter        | 13                                  | 53                     | 38                       | 233 (13x1+53x2+38x3)                      |
| Total         | 59                                  | 100                    | 45                       | 394 (59x1+100x2+45x3)                     |
